# Supplementary material
Source: Springer Nature journal article supplement (https://www.springermedizin.de/resource/supplementary/12967_2012_1397_MOESM3_ESM.pdf/9573402)

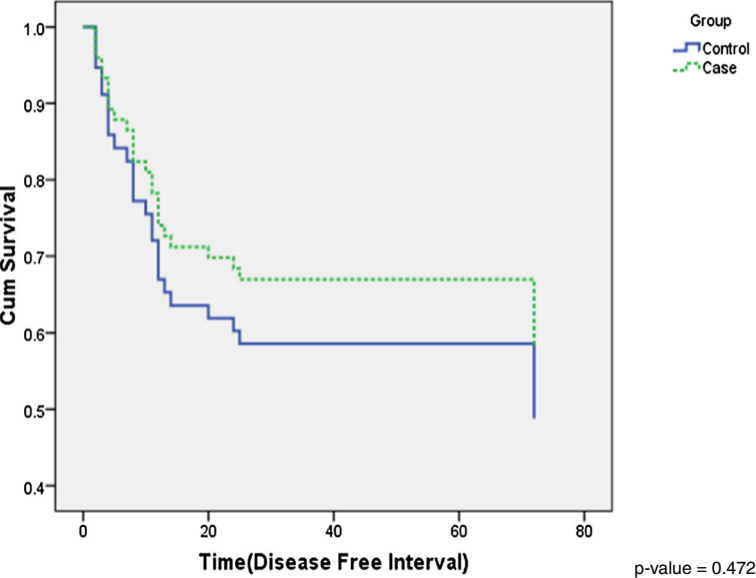

Supplement: MOESM3 [file 9573402]
